# Supplementary material for: Elucidating the mechanisms underlying PCBM enhancement of CH3NH3PbI3 perovskite solar cells using GIXRD and XAFS
Source: Royal Society of Chemistry journal article supplement (doi:10.1039/c9ta10763k), 2019-12-30
Supplement: c9ta10763k1.pdf [file c9ta10763k1.pdf]

## Supporting Information

### **Elucidating the Mechanisms Underlying PCBM enhancement of CH<sub>3</sub>NH<sub>3</sub>PbI<sub>3</sub> Perovskite Solar Cells using GIXRD and XAFS**

*Bing Liu, Rongli Cui, Huan Huang, Xihong Guo, Jinqun Dong, Huanli Yao, Ying Li,  
Dangui Zhao, Jiahao Wang, Jing Zhang, Yu Chen and Baoyun Sun\**

B. Liu, Prof. R. Cui, Prof. H. Huang, Prof. X. Guo, J. Dong, Dr. H. Yao, Y. Li, D. Zhao, J.  
Wang, Prof. B. Sun

CAS Key Lab for Biomedical Effects of Nanomaterials & Nanosafety, Institute of  
High Energy Physics, Chinese Academy of Sciences, Beijing 100049, China

E-mail: sunby@ihep.ac.cn

Prof. J. Zhang, Prof. Y. Chen

Beijing Synchrotron Radiation Facility, Institute of High Energy Physics, Chinese  
Academy of Sciences, Beijing 100049, China

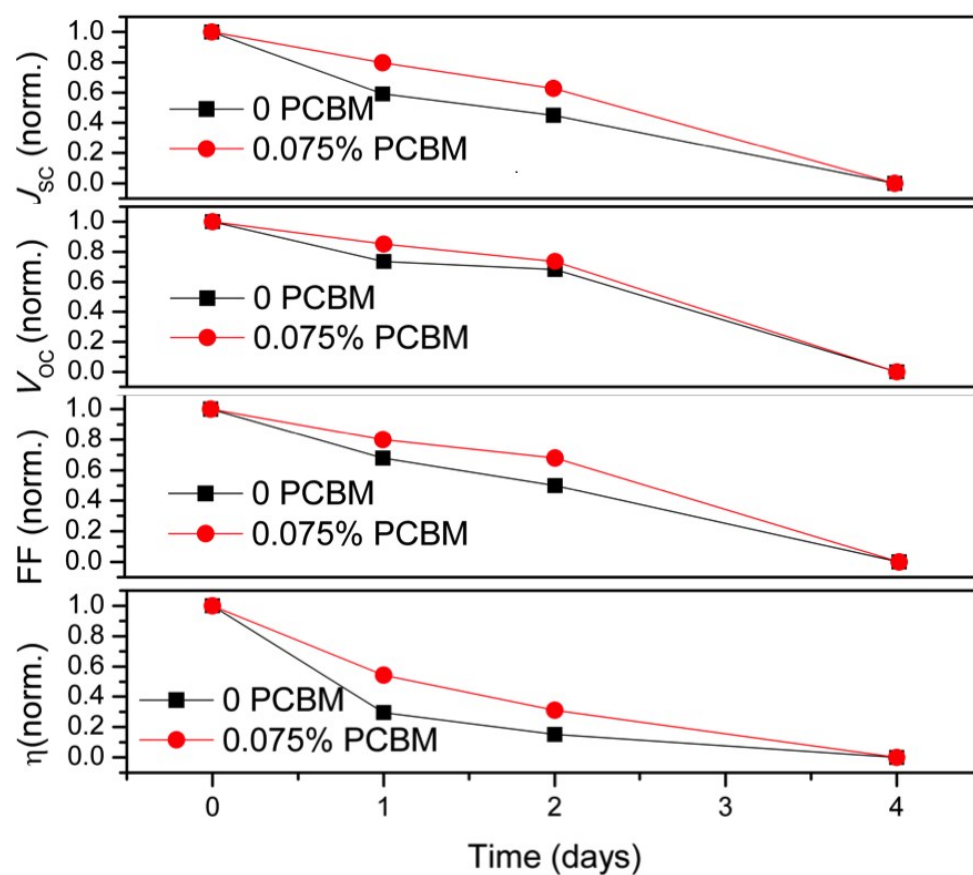

Figure S1. Stacked plot of the normalized performance parameters with time for devices of MAPbI<sub>3</sub> and 0.075% PCBM-doped MAPbI<sub>3</sub> stored in illumination.

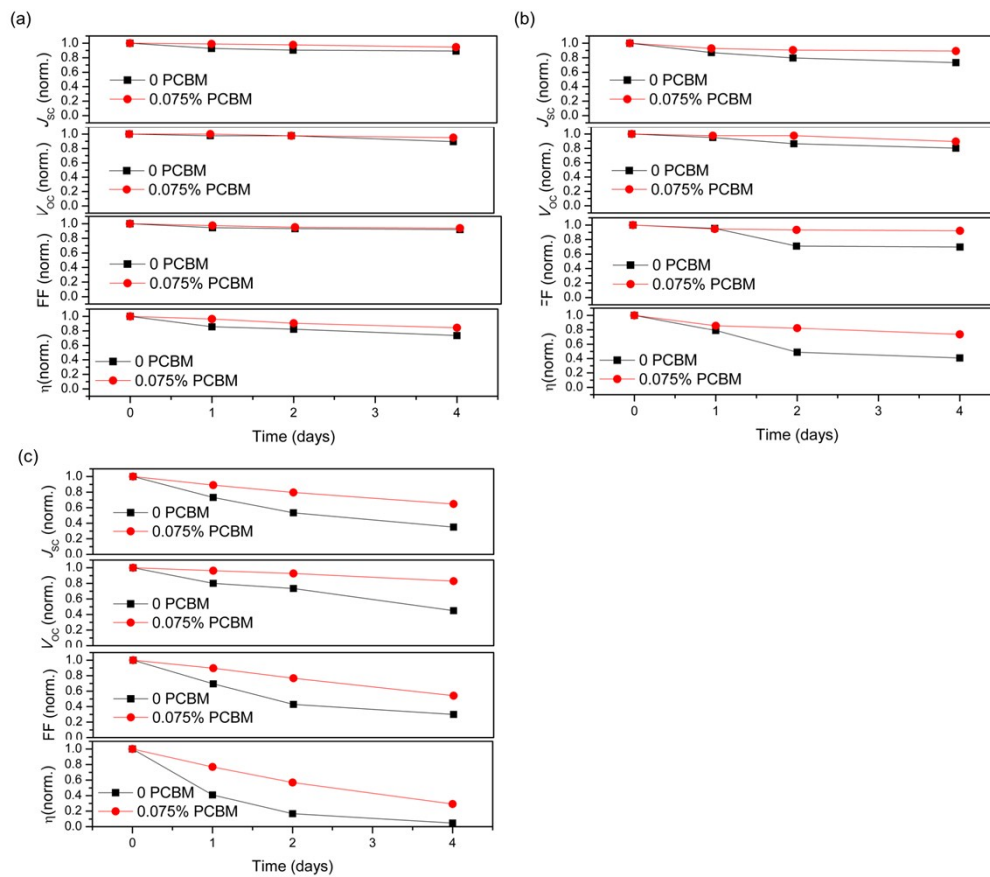

Figure S2. Stacked plot of the normalized performance parameters with time for devices of MAPbI<sub>3</sub> and 0.075% PCBM-doped MAPbI<sub>3</sub> stored in (a) 20% RH, (b) 50% RH and (c) 90% RH.

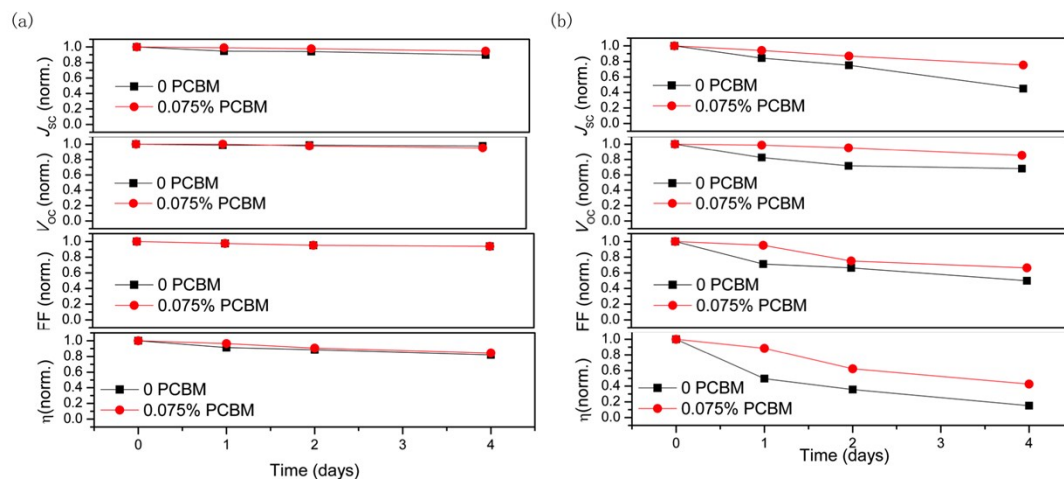

Figure S3. Stacked plot of the normalized performance parameters with time for devices of MAPbI<sub>3</sub> and 0.075% PCBM-doped MAPbI<sub>3</sub> stored in (a) 50°C and (b) 85°C.

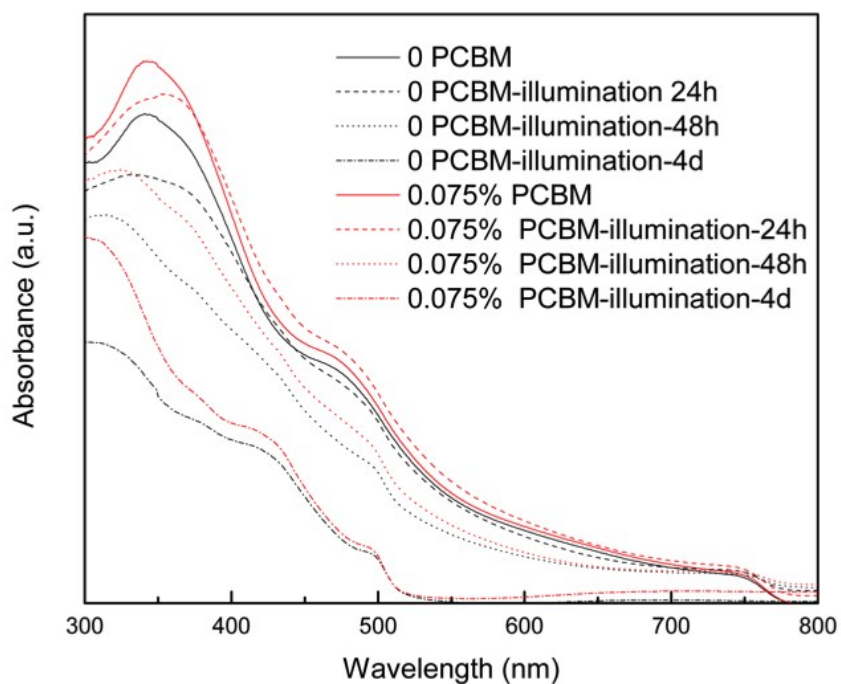

Figure S4. UV-Vis spectra of the pristine MAPbI<sub>3</sub> film and the 0.075% PCBM-doped MAPbI<sub>3</sub> films after illumination.

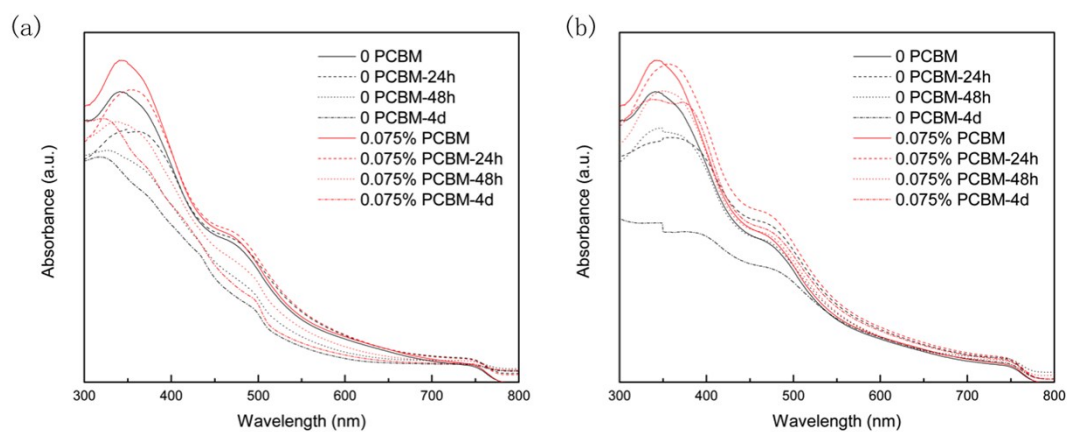

Figure S5. UV-Vis spectra of the pristine MAPbI<sub>3</sub> film and the 0.075% PCBM-doped MAPbI<sub>3</sub> films after (a) 20% RH and (b) 50% RH.

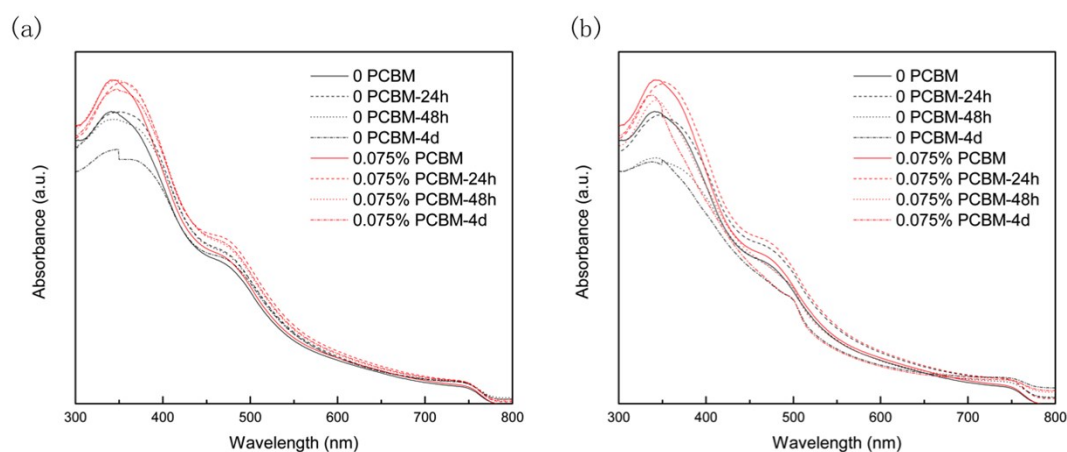

Figure S6. UV-Vis spectra of the pristine MAPbI<sub>3</sub> film and the 0.075% PCBM-doped MAPbI<sub>3</sub> films after (a) 50 °C and (b) 85 °C treatment.

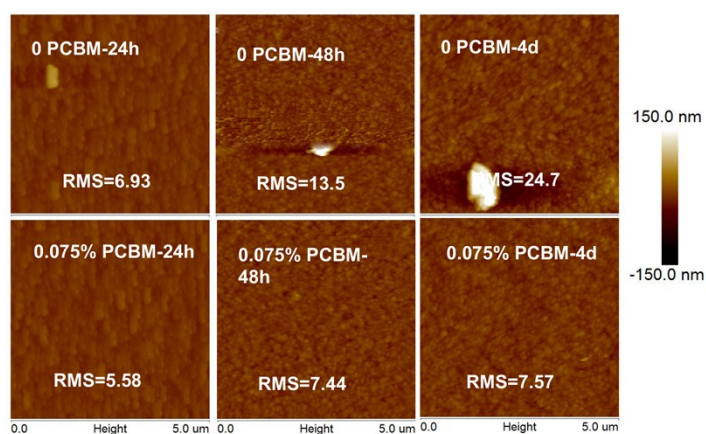

Figure S7. AFM images of the pristine MAPbI<sub>3</sub> film and the 0.075% PCBM-doped MAPbI<sub>3</sub> films after illumination.

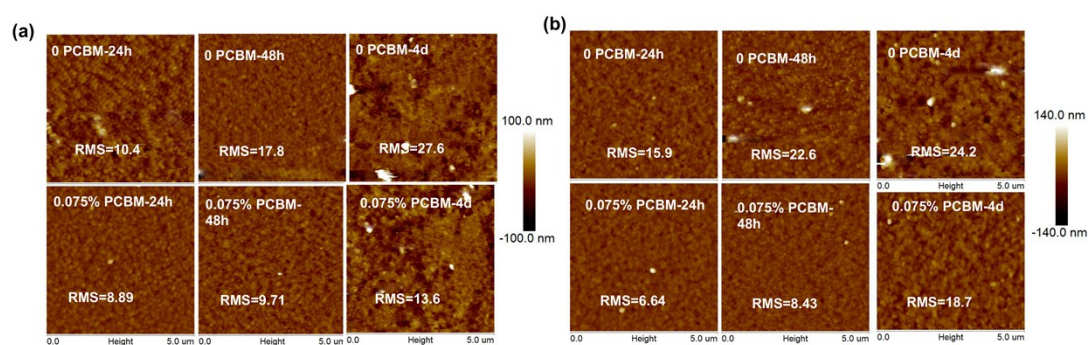

Figure S8. AFM images of the pristine MAPbI<sub>3</sub> film and the 0.075% PCBM-doped MAPbI<sub>3</sub> films after (a) 20% RH and (b) 50% RH.

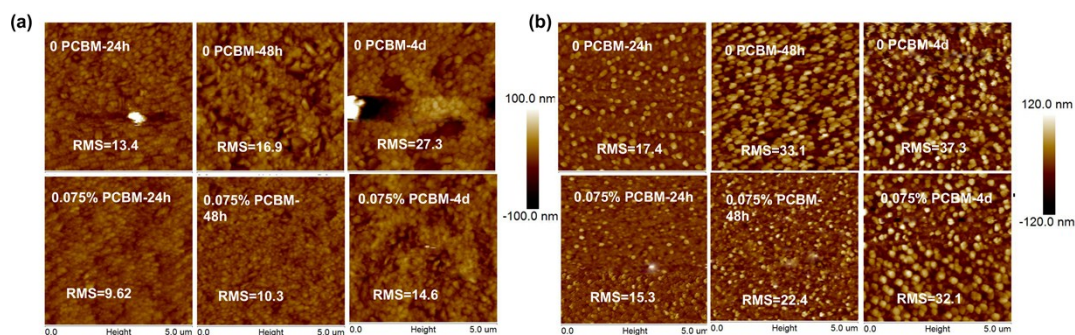

Figure S9. AFM images of the pristine MAPbI<sub>3</sub> film and the 0.075% PCBM-doped MAPbI<sub>3</sub> films after (a) 50°C and (b) 85°C treatment.

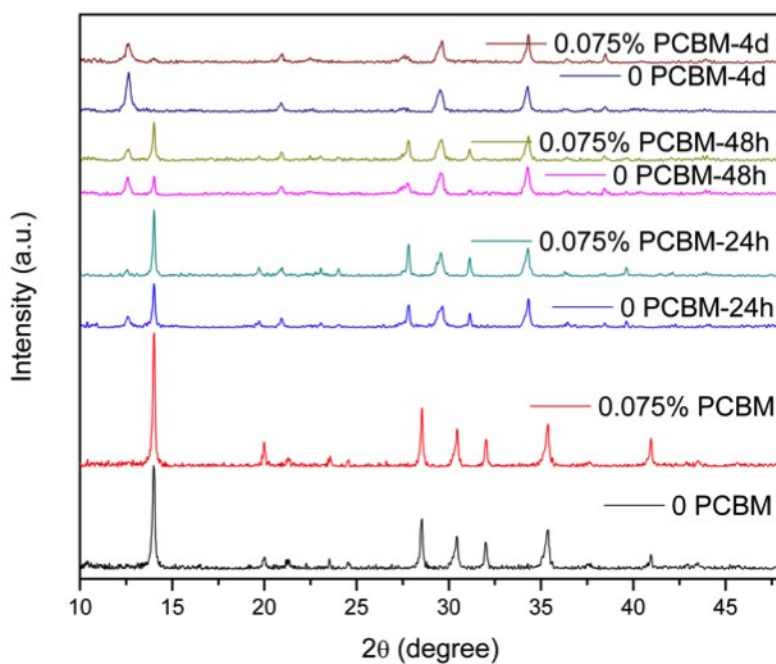

Figure S10. XRD patterns of the pristine MAPbI<sub>3</sub> film and the 0.075% PCBM-doped MAPbI<sub>3</sub> films after illumination.

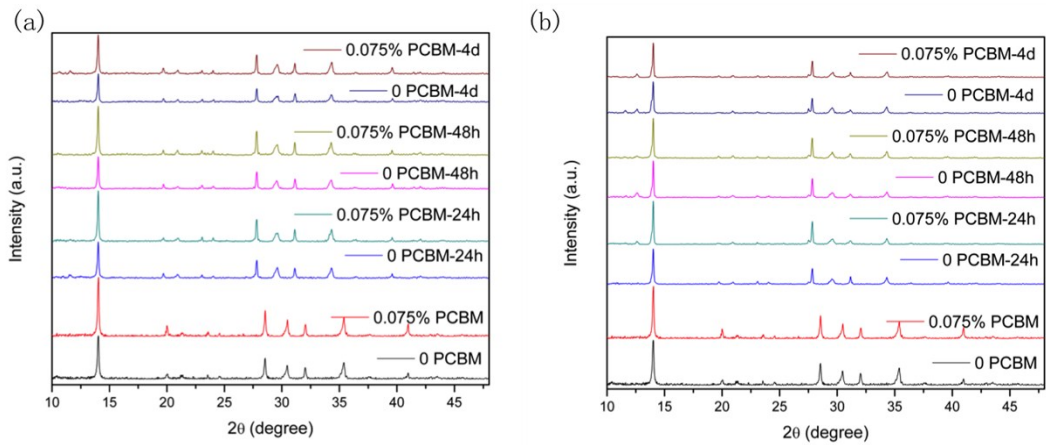

Figure S11. XRD patterns of the pristine MAPbI<sub>3</sub> film and the 0.075% PCBM-doped MAPbI<sub>3</sub> films after (a) 20% RH and (b) 50% RH treatment.

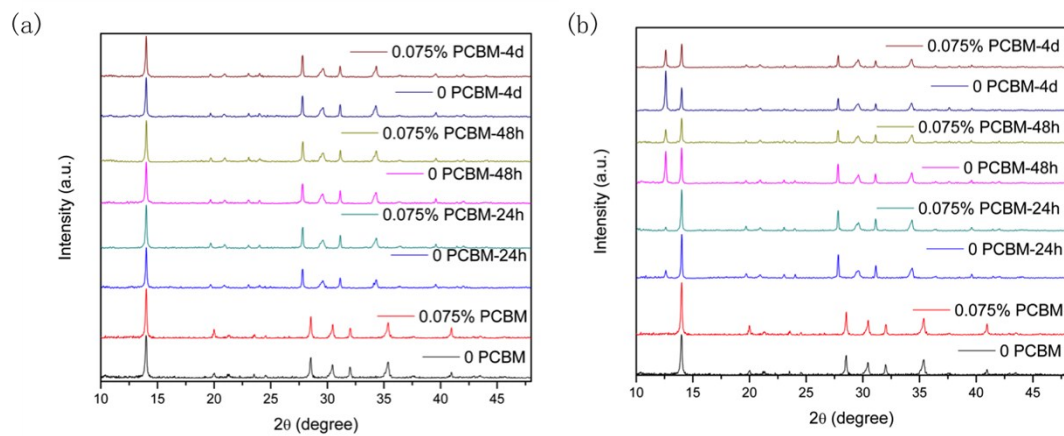

Figure S12. XRD patterns of the pristine MAPbI<sub>3</sub> film and the 0.075% PCBM-doped MAPbI<sub>3</sub> films after (a) 50°C and (b) 85°C treatment.

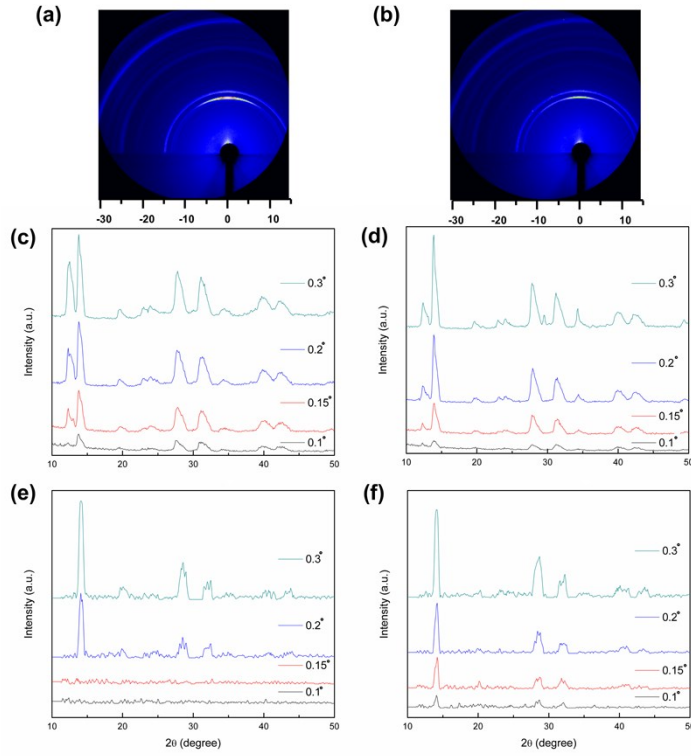

Figure S13. GIXRD patterns of the samples after illumination treatment. 2D-GIXRD profiles of (a) MAPbI<sub>3</sub> and (b) 0.075% PCBM-doped MAPbI<sub>3</sub> films. 1D-GIXRD profiles of (c) MAPbI<sub>3</sub> and (d) 0.075% PCBM-doped MAPbI<sub>3</sub> films obtained in OOP mode. 1D-GIXRD profiles of (e) MAPbI<sub>3</sub> and (f) 0.075% PCBM-doped MAPbI<sub>3</sub> films obtained in IP mode.

The depth of penetration of X-ray is:

$$L = \frac{\lambda}{2\pi\sqrt{\alpha_c^2 - \sin^2\alpha_i}}$$

Therefore, by using three different incident angles of 0.1, 0.2 and 0.3° , we are able to reveal the structural difference in the perovskite films at a theoretical probing depth of ~30, ~200 and ~ 700nm, respectively. That is, the measured signal is only the information of the surface and near surface when the incident angle is 0.1° ; the measured signal is basically the internal information of the thin films when the incident angle is 0.2° ; and the measured signal is the diffraction information of whole films contained the thin films and substrate when the incident angle increase to 0.3° .



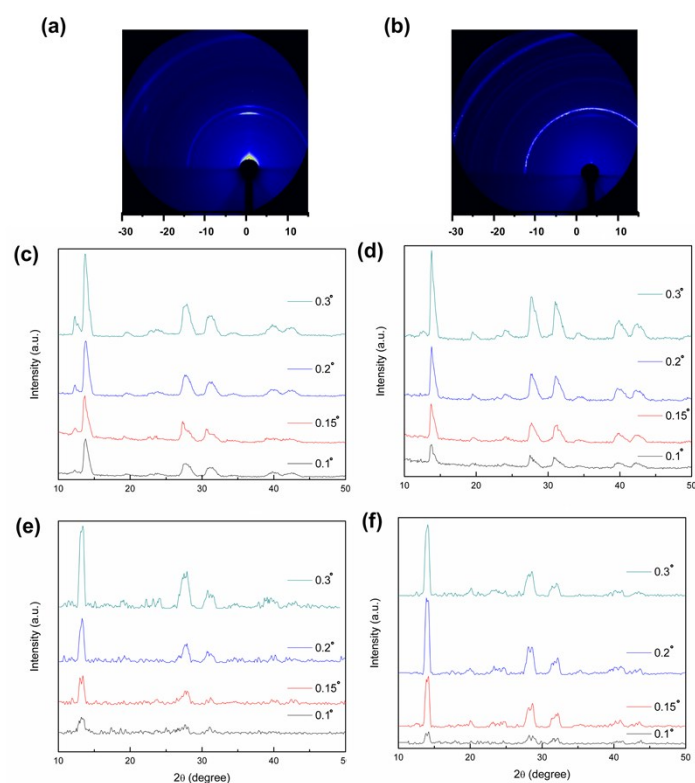

Figure S14. GIXRD patterns of the samples after  $85^{\circ}\text{C}$  treatment. 2D-GIXRD profiles of (a)  $\text{MAPbI}_3$  and (b) 0.075% PCBM-doped  $\text{MAPbI}_3$  films. 1D-GIXRD profiles of (c)  $\text{MAPbI}_3$  and (d) 0.075% PCBM-doped  $\text{MAPbI}_3$  films obtained in OOP mode. 1D-GIXRD profiles of (e)  $\text{MAPbI}_3$  and (f) 0.075% PCBM-doped  $\text{MAPbI}_3$  films obtained in IP mode.

The figures of GIXRD patterns of the samples after other humidity (20% and 50% RH) and temperature ( $50^{\circ}\text{C}$ ) treatment are similar, but the variation degree is low.

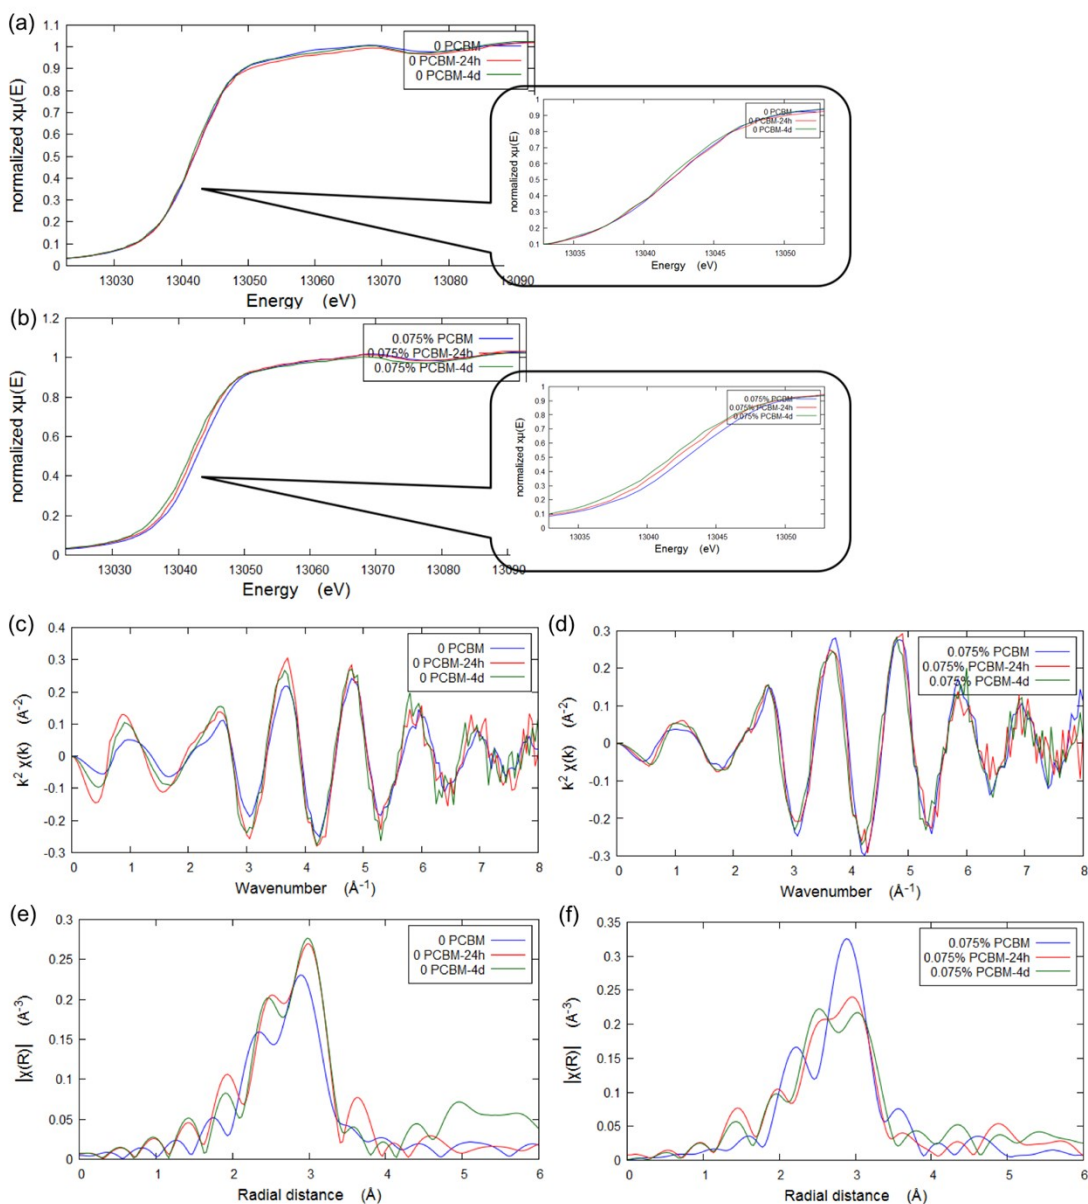

Figure S15. XAFS characterization of the samples after illumination treatment. Normalized Pb L<sub>3</sub>-edge XANES spectra of (a) the pristine MAPbI<sub>3</sub> film, and (b) the 0.075% PCBM-doped MAPbI<sub>3</sub> film. k-weighted EXAFS spectra of (c) the pristine MAPbI<sub>3</sub> film, and (d) the 0.075% PCBM-doped MAPbI<sub>3</sub> film. Phase uncorrected FT of the EXAFS spectra of (e) the pristine MAPbI<sub>3</sub> film, and (f) the 0.075% PCBM-doped MAPbI<sub>3</sub> film.

The XAFS of the samples with different PCBM content (0.01%, 0.05%, 0.1% and 0.2%) are also tested, and if the PCBM content is too high (>0.1%), the change is similar to that of undoped film.

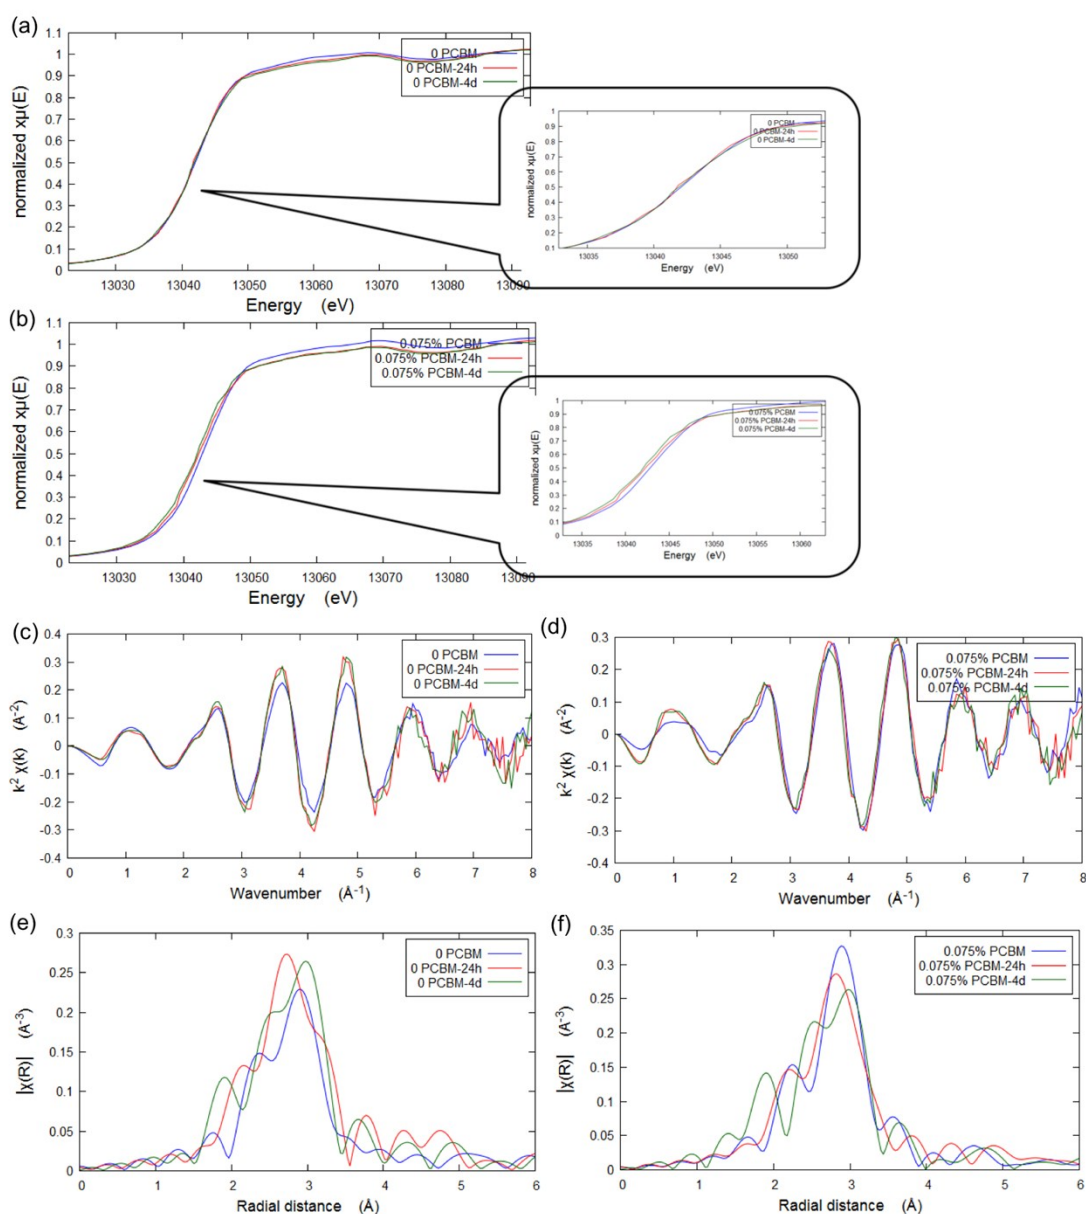

Figure S16. XAFS characterization of the samples after 85°C treatment. Normalized Pb L<sub>3</sub>-edge XANES spectra of (a) the pristine MAPbI<sub>3</sub> film, and (b) the 0.075% PCBM-doped MAPbI<sub>3</sub> film. k-weighted EXAFS spectra of (c) the pristine MAPbI<sub>3</sub> film, and (d) the 0.075% PCBM-doped MAPbI<sub>3</sub> film. Phase uncorrected FT of the EXAFS spectra of (e) the pristine MAPbI<sub>3</sub> film, and (f) the 0.075% PCBM-doped MAPbI<sub>3</sub> film.

The figures of XAFS characterizations of the samples after other humidity (20% and 50% RH) and temperature (50°C) treatment are similar, but the variation degree is low.

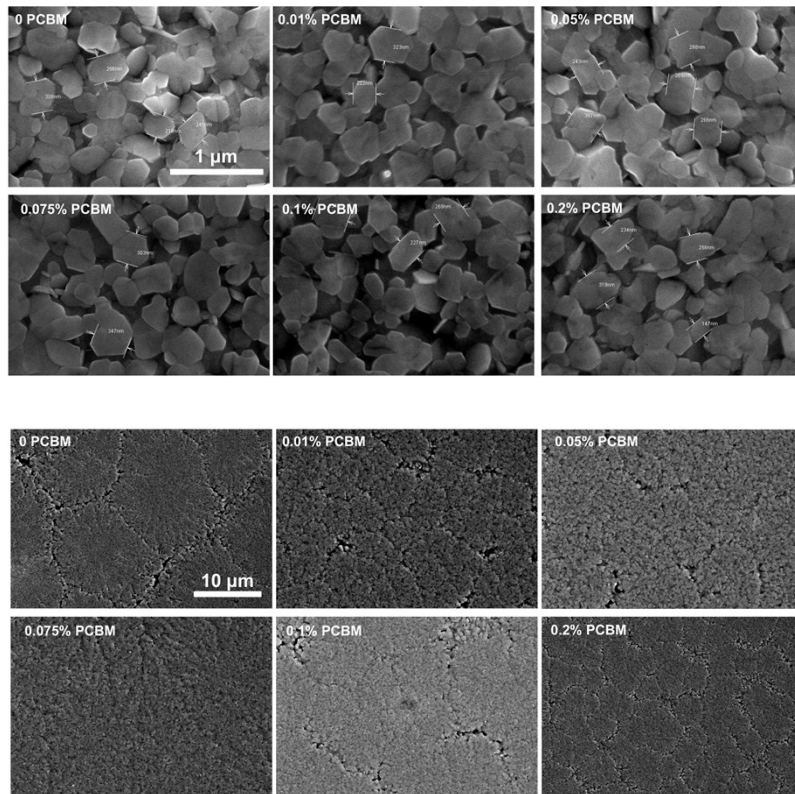

Figure S17. SEM images of the pristine MAPbI<sub>3</sub> film and the PCBM-doped MAPbI<sub>3</sub> films with different mass fraction of 0, 0.01%, 0.05%, 0.075%, 0.1% and 0.2% PCBM.

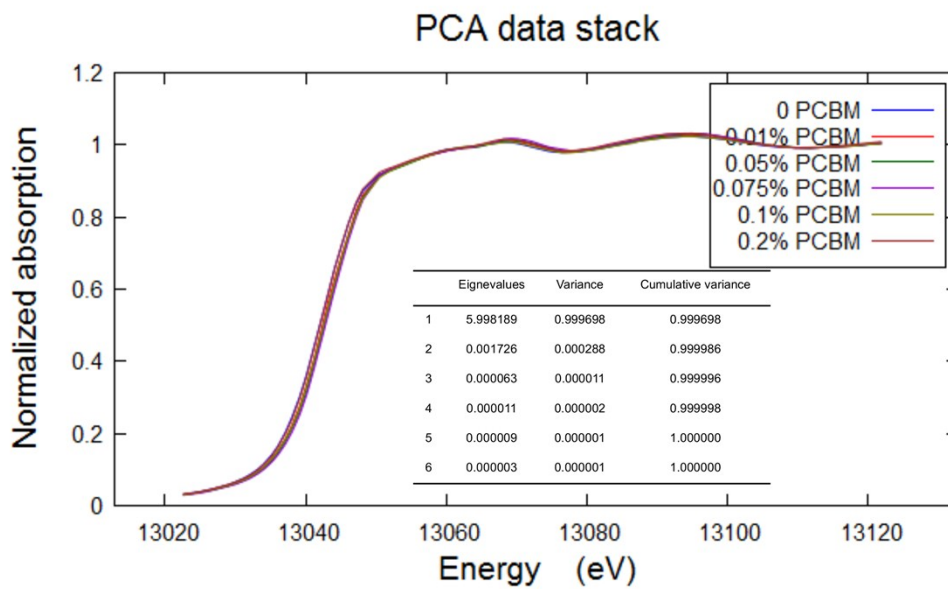

Figure S18. Reconstructed spectra of samples and PCA decomposition results.

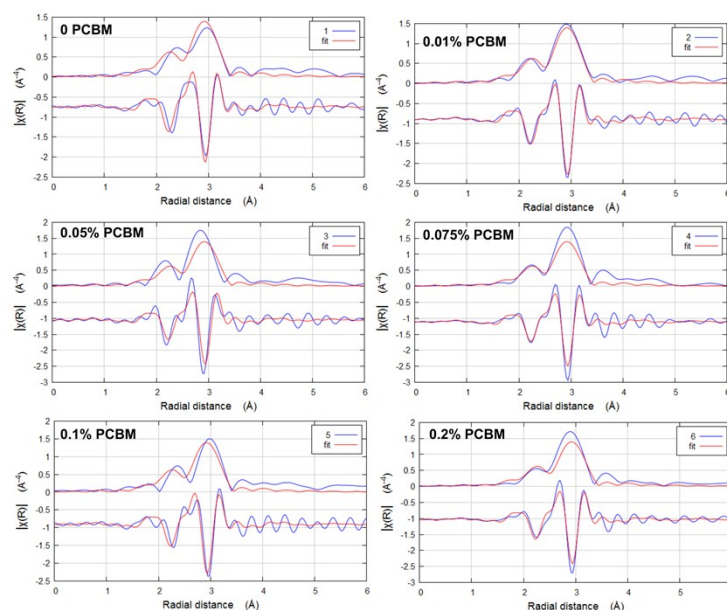

Figure S19. The fitting results of the Pb L<sub>3</sub> EXAFS by scattering from a single coordination shell of iodine.

Table S1. Photovoltaic parameters of perovskite solar cells made of MAPbI<sub>3</sub>/PCBM active layer with different mass fraction of 0, 0.01%, 0.05%, 0.075%, 0.1% and 0.2% PCBM.

| PCBM ratio [wt %] | J <sub>sc</sub> [mA cm <sup>-2</sup> ] | V <sub>oc</sub> [V] | FF   | PCE [%] |
|-------------------|----------------------------------------|---------------------|------|---------|
| 0                 | 20.28                                  | 0.97                | 0.67 | 13.18   |
| 0.01              | 21.22                                  | 0.96                | 0.75 | 15.28   |
| 0.05              | 22.08                                  | 0.96                | 0.77 | 16.32   |
| 0.075             | 23.44                                  | 0.98                | 0.80 | 18.38   |
| 0.1               | 21.25                                  | 0.97                | 0.70 | 14.43   |
| 0.2               | 18.29                                  | 0.95                | 0.64 | 11.12   |

Table S2. The changes in photovoltaic parameters of 0 and 0.075% PCBM-doped devices during 4 days under humidity (20%, 50%, 90%), illumination and heating (50°C, 85°C).

| Treatment | 0 PCBM          |                 |    |     | 0.075% PCBM     |                 |    |     |
|-----------|-----------------|-----------------|----|-----|-----------------|-----------------|----|-----|
| time      | J <sub>sc</sub> | V <sub>oc</sub> | FF | PCE | J <sub>sc</sub> | V <sub>oc</sub> | FF | PCE |
| 20% RH    |                 |                 |    |     |                 |                 |    |     |

|              |       |       |       |       |       |       |       |       |
|--------------|-------|-------|-------|-------|-------|-------|-------|-------|
| 0h           | 1.000 | 1.000 | 1.000 | 1.000 | 1.000 | 1.000 | 1.000 | 1.000 |
| 24h          | 0.927 | 0.976 | 0.946 | 0.856 | 0.99  | 1.000 | 0.975 | 0.965 |
| 48h          | 0.904 | 0.976 | 0.932 | 0.822 | 0.976 | 0.976 | 0.950 | 0.905 |
| 4d           | 0.893 | 0.894 | 0.919 | 0.734 | 0.945 | 0.951 | 0.938 | 0.843 |
| 50% RH       |       |       |       |       |       |       |       |       |
| 0h           | 1.000 | 1.000 | 1.000 | 1.000 | 1.000 | 1.000 | 1.000 | 1.000 |
| 24h          | 0.872 | 0.951 | 0.953 | 0.790 | 0.927 | 0.976 | 0.946 | 0.856 |
| 48h          | 0.796 | 0.864 | 0.710 | 0.488 | 0.904 | 0.976 | 0.932 | 0.822 |
| 4d           | 0.732 | 0.802 | 0.696 | 0.409 | 0.893 | 0.894 | 0.919 | 0.734 |
| 90% RH       |       |       |       |       |       |       |       |       |
| 0h           | 1.000 | 1.000 | 1.000 | 1.000 | 1.000 | 1.000 | 1.000 | 1.000 |
| 24h          | 0.732 | 0.802 | 0.696 | 0.409 | 0.890 | 0.964 | 0.897 | 0.770 |
| 48h          | 0.535 | 0.735 | 0.428 | 0.168 | 0.797 | 0.928 | 0.769 | 0.569 |
| 4d           | 0.350 | 0.450 | 0.300 | 0.047 | 0.648 | 0.829 | 0.541 | 0.291 |
| illumination |       |       |       |       |       |       |       |       |
| 0h           | 1.000 | 1.000 | 1.000 | 1.000 | 1.000 | 1.000 | 1.000 | 1.000 |
| 24h          | 0.591 | 0.735 | 0.679 | 0.295 | 0.797 | 0.850 | 0.800 | 0.542 |
| 48h          | 0.450 | 0.680 | 0.50  | 0.153 | 0.626 | 0.735 | 0.679 | 0.312 |
| 4d           | 0     | 0     | 0     | 0     | 0     | 0     | 0     | 0     |
| 50°C         |       |       |       |       |       |       |       |       |
| 0h           | 1.000 | 1.000 | 1.000 | 1.000 | 1.000 | 1.000 | 1.000 | 1.000 |
| 24h          | 0.947 | 0.988 | 0.975 | 0.912 | 0.99  | 1.000 | 0.975 | 0.965 |
| 48h          | 0.941 | 0.988 | 0.95  | 0.883 | 0.976 | 0.976 | 0.950 | 0.905 |
| 4d           | 0.896 | 0.976 | 0.938 | 0.820 | 0.945 | 0.951 | 0.938 | 0.843 |
| 85°C         |       |       |       |       |       |       |       |       |
| 0h           | 1.000 | 1.000 | 1.000 | 1.000 | 1.000 | 1.000 | 1.000 | 1.000 |
| 24h          | 0.842 | 0.824 | 0.713 | 0.495 | 0.941 | 0.988 | 0.95  | 0.883 |
| 48h          | 0.75  | 0.718 | 0.663 | 0.357 | 0.87  | 0.951 | 0.75  | 0.621 |
| 4d           | 0.45  | 0.68  | 0.5   | 0.153 | 0.754 | 0.854 | 0.663 | 0.427 |

Table S3. The changes in absorption area calculated from UV-visible absorption spectra of 0 and 0.075% PCBM-doped devices during 4 days under

humidity (20%, 50%, 90%), illumination and heating (50 °C, 85 °C).

| Treatment time | 0 PCBM-doped | 0.01% PCBM-doped | 0.05% PCBM-doped | 0.075% PCBM-doped | 0.1% PCBM-doped | 0.2% PCBM-doped |
|----------------|--------------|------------------|------------------|-------------------|-----------------|-----------------|
|                | 586.7        | 597.5            | 604.3            | 631.8             | 625.5           | 572.3           |
| 20% RH         |              |                  |                  |                   |                 |                 |
| 24h            | 553.1        | 560              | 574.5            | 614               | 536.8           | 530             |
| 48d            | 541.5        | 553.8            | 569.1            | 594.6             | 531.9           | 497.7           |
| 4d             | 357.9        | 469.2            | 475.9            | 514.3             | 466.4           | 465.1           |
| 50% RH         |              |                  |                  |                   |                 |                 |
| 24h            | 500.8        | 541              | 565.3            | 571.2             | 551.8           | 526.4           |
| 48d            | 470.7        | 475.1            | 500.3            | 518.3             | 501.4           | 495.2           |
| 4d             | 350.7        | 366              | 451.7            | 585.8             | 526.3           | 363.1           |
| 90% RH         |              |                  |                  |                   |                 |                 |
| 24h            | 481.7        | 488.1            | 488.2            | 518.2             | 494.1           | 457.9           |
| 48d            | 398.8        | 422              | 432.3            | 448.9             | 436.5           | 413.7           |
| 4d             | 213.9        | 260.2            | 397.1            | 408               | 405.3           | 309.9           |
| illumination   |              |                  |                  |                   |                 |                 |
| 24h            | 462.9        | 479.9            | 505.2            | 535.1             | 493             | 465.4           |
| 48d            | 369.7        | 387.8            | 414.8            | 420.6             | 415.7           | 371             |
| 4d             | 181.1        | 184.8            | 186.3            | 228.4             | 200.5           | 188.3           |
| 50°C           |              |                  |                  |                   |                 |                 |
| 24h            | 521.7        | 554.3            | 555.8            | 558.6             | 544.4           | 515.2           |
| 48d            | 514.5        | 524.6            | 546.7            | 556.4             | 539.4           | 506.6           |
| 4d             | 474.3        | 522.7            | 540.6            | 548.3             | 507.4           | 481.5           |
| 85°C           |              |                  |                  |                   |                 |                 |
| 24h            | 528.6        | 530.6            | 535.1            | 558               | 526.8           | 510.4           |
| 48d            | 462          | 467.7            | 480.2            | 505.8             | 486             | 431             |
| 4d             | 438.3        | 460.4            | 469.5            | 483.5             | 480             | 402.5           |

Table S4. The changes in root mean square (RMS) calculated from AFM images of 0 and 0.075% PCBM-doped devices during 4 days under humidity (20%,

50%, 90%), illumination and heating (50 °C, 85 °C).

| Treatment<br>time | 0 PCBM-<br>doped | 0.01%<br>PCBM-<br>doped | 0.05% PCBM-<br>doped | 0.075%<br>PCBM-<br>doped | 0.1% PCBM-<br>doped | 0.2% PCBM-<br>doped |
|-------------------|------------------|-------------------------|----------------------|--------------------------|---------------------|---------------------|
|                   | 5.42             | 4.84                    | 4.28                 | 1329                     | 3.54                | 4.93                |
| 20% RH            |                  |                         |                      |                          |                     |                     |
| 24h               | 10.4             | 10.2                    | 7.37                 | 8.99                     | 9.3                 | 10.1                |
| 48d               | 17.8             | 11.3                    | 9.86                 | 9.71                     | 9.88                | 11.4                |
| 4d                | 27.6             | 16.2                    | 16.5                 | 13.6                     | 15.6                | 18.2                |
| 50% RH            |                  |                         |                      |                          |                     |                     |
| 24h               | 15.9             | 10.9                    | 7.66                 | 6.64                     | 15.2                | 19.5                |
| 48d               | 22.6             | 14.2                    | 13.2                 | 8.43                     | 16.2                | 27.7                |
| 4d                | 24.2             | 22.2                    | 18.9                 | 18.7                     | 18.9                | 29.4                |
| 90% RH            |                  |                         |                      |                          |                     |                     |
| 24h               | 29.3             | 21.5                    | 19.1                 | 16.0                     | 21.8                | 35.4                |
| 48d               | 33.1             | 26.3                    | 20.1                 | 18.0                     | 22.0                | 39.0                |
| 4d                | 84.9             | 71.1                    | 38.9                 | 31.6                     | 52.0                | 163.0               |
| illumination      |                  |                         |                      |                          |                     |                     |
| 24h               | 6.93             | 6.82                    | 5.64                 | 5.58                     | 5.86                | 7.86                |
| 48d               | 13.5             | 11.8                    | 8.82                 | 7.44                     | 11.3                | 12.4                |
| 4d                | 24.7             | 14.8                    | 10.2                 | 7.57                     | 12.0                | 17.3                |
| 50°C              |                  |                         |                      |                          |                     |                     |
| 24h               | 13.4             | 12.8                    | 9.98                 | 9.62                     | 10.9                | 11.8                |
| 48d               | 16.9             | 13.2                    | 10.7                 | 10.3                     | 11.8                | 13                  |
| 4d                | 27.3             | 17.2                    | 17.1                 | 14.6                     | 18.1                | 19.8                |
| 85°C              |                  |                         |                      |                          |                     |                     |
| 24h               | 17.4             | 17.3                    | 15.8                 | 15.3                     | 16.3                | 22.3                |
| 48d               | 33.1             | 29.2                    | 29                   | 22.4                     | 22.8                | 29.3                |
| 4d                | 37.3             | 35                      | 33.6                 | 32.1                     | 33.6                | 36.1                |



Table S5. The changes in the ratio of diffraction peak intensity of  $\text{PbI}_2$  (100) to  $\text{MAPbI}_3$  (110) calculated from XRD patterns of 0 and 0.075% PCBM-doped devices during 4 days under humidity (20%, 50%, 90%), illumination and heating ( $50^\circ\text{C}$ ,  $85^\circ\text{C}$ ).

| Treatment time | 0 PCBM-doped | 0.01% PCBM-doped | 0.05% PCBM-doped | 0.075% PCBM-doped | 0.1% PCBM-doped | 0.2% PCBM-doped |
|----------------|--------------|------------------|------------------|-------------------|-----------------|-----------------|
|                | 0            | 0                | 0                | 0                 | 0               | 0               |
| 20% RH         |              |                  |                  |                   |                 |                 |
| 24h            | 2.7          | 1.9              | 0                | 0                 | 0               | 1.5             |
| 48d            | 8.1          | 2.2              | 1.8              | 0                 | 0               | 2.2             |
| 4d             | 11.4         | 6.6              | 2.1              | 0                 | 0               | 4.4             |
| 50% RH         |              |                  |                  |                   |                 |                 |
| 24h            | 9.7          | 6.4              | 5.7              | 2                 | 3.7             | 5.4             |
| 48d            | 19.2         | 17.3             | 12.4             | 8.4               | 9.7             | 18.9            |
| 4d             | 27.3         | 22.5             | 16.6             | 10.8              | 11.1            | 23              |
| 90% RH         |              |                  |                  |                   |                 |                 |
| 24h            | 23.4         | 14.3             | 7.6              | 1.4               | 2.7             | 8.9             |
| 48d            | 100.2        | 64.6             | 62.1             | 33.3              | 39.1            | 47.6            |
| 4d             | 311.5        | 261.8            | 245.7            | 85.0              | 96.8            | 155.5           |
| illumination   |              |                  |                  |                   |                 |                 |
| 24h            | 48.0         | 27.2             | 26.3             | 9.6               | 20.1            | 22.8            |
| 48d            | 156.9        | 122.7            | 99.4             | 50.7              | 75.6            | 126.7           |
| 4d             |              |                  | 1010.1           | 830.4             | 857.9           | 988.3           |
| 50°C           |              |                  |                  |                   |                 |                 |
| 24h            | 3.8          | 1.1              | 0.7              | 0                 | 0               | 1.7             |
| 48d            | 6.4          | 3.5              | 1.2              | 0                 | 1.3             | 2.7             |
| 4d             | 8.7          | 4                | 1.8              | 0.7               | 1.7             | 3.2             |
| 85°C           |              |                  |                  |                   |                 |                 |
| 24h            | 22.9         | 15.8             | 12.9             | 7.7               | 8.8             | 26.1            |
| 48d            | 111.6        | 94.5             | 89.9             | 54.4              | 59.1            | 73.9            |
| 4d             | 184.5        | 135.0            | 125.5            | 80.8              | 161.3           | 347.8           |

Table S6. Parameters obtained from fitting the Pb L<sub>3</sub> EXAFS by scattering from a single coordination shell of iodine.

| Sample      | Atomic number, N | Amplitude damping factor, S <sub>0</sub> <sup>2</sup> | Debye-Waller factor, σ <sup>2</sup> (Å <sup>2</sup> ) | Bond length, r (Å) |
|-------------|------------------|-------------------------------------------------------|-------------------------------------------------------|--------------------|
| 0 PCBM      | 6                | 0.223                                                 | 0.02021                                               | 3.1581             |
|             |                  |                                                       |                                                       | 3.2624             |
| 0.01% PCBM  | 6                | 0.208                                                 | 0.01844                                               | 3.1581             |
|             |                  |                                                       |                                                       | 3.2624             |
| 0.05% PCBM  | 6                | 0.196                                                 | 0.01707                                               | 3.1581             |
|             |                  |                                                       |                                                       | 3.2624             |
| 0.075% PCBM | 6                | 0.194                                                 | 0.01636                                               | 3.1581             |
|             |                  |                                                       |                                                       | 3.2624             |
| 0.1% PCBM   | 6                | 0.193                                                 | 0.01639                                               | 3.1581             |
|             |                  |                                                       |                                                       | 3.2624             |
| 0.2% PCBM   | 6                | 0.191                                                 | 0.01593                                               | 3.1581             |
|             |                  |                                                       |                                                       | 3.2624             |
